# Supplementary material for: Boosted Solar Light Absorbance in PdS2/PtS2 Vertical Heterostructures for Ultrathin Photovoltaic Devices
Source: PubMed Central journal article supplement (PMC8447185; doi:10.1021/acsami.1c11245), 2021-09-01
Supplement: am1c11245_si_001.pdf [file am1c11245_si_001.pdf]

Supporting Information for  
**Boosted solar light absorbance in PdS<sub>2</sub>/PtS<sub>2</sub> vertical heterostructures  
for ultrathin photovoltaic devices**

Lorenzo Bastonero<sup>a,b</sup>, Giancarlo Cicero<sup>c</sup>, Maurizia Palummo<sup>d</sup> and Michele Re Fiorentin<sup>e,\*</sup>

<sup>a</sup>*Dipartimento di Fisica, Università degli studi Torino, via Giuria 1, 10125, Torino, Italy*

<sup>b</sup>*U Bremen Excellence Chair “Materials design and discovery” and  
Hybrid Materials Interfaces Group,  
Bremen Center for Computational Materials Science, University of Bremen, Am Fallturm 1,  
28359 Bremen, Germany*

<sup>c</sup>*Dipartimento di Scienza Applicata e Tecnologia, Politecnico di Torino,  
corso Duca degli Abruzzi 24, 10129 Torino, Italy*

<sup>d</sup>*Dipartimento di Fisica and INFN, Università di Roma “Tor Vergata”, via della Ricerca  
Scientifica 1, 00133, Roma, Italy*

<sup>e</sup>*Center for Sustainable Future Technologies, Istituto Italiano di Tecnologia,  
via Livorno 60, 10144 Torino, Italy*

---

\*michele.refiorentin@iit.it

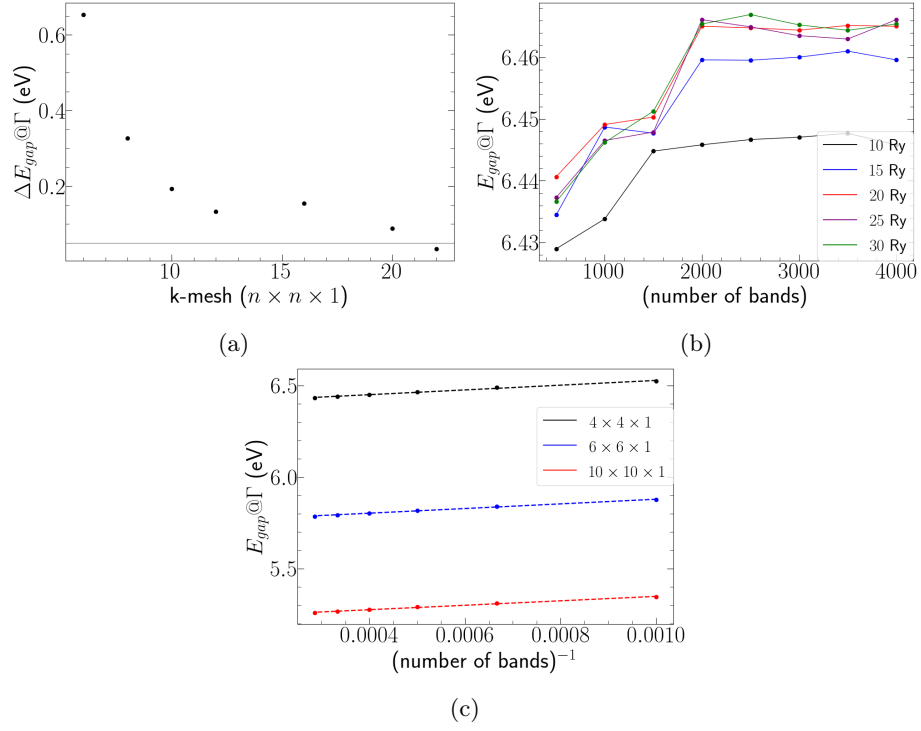

Figure S1: Convergence of GW calculations with respect to the  $k$ -point grid (a) and the dielectric screening (b). In (c) we show the extrapolation procedure to obtain the correction due to the number of included bands in  $\Sigma_c$ . Reported values are for PtS<sub>2</sub>.

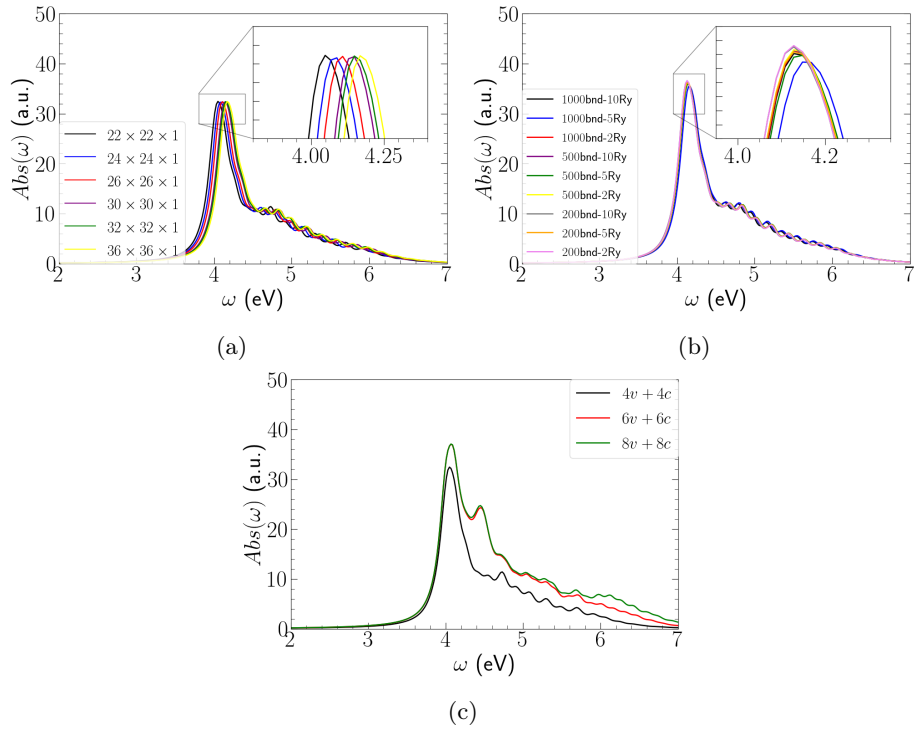

Figure S2: Convergence of BSE calculations with respect to the  $k$ -point grid (a), the static screening parameters (b) and the number of bands included in the kernel (c). Reported values are for PtS<sub>2</sub>.

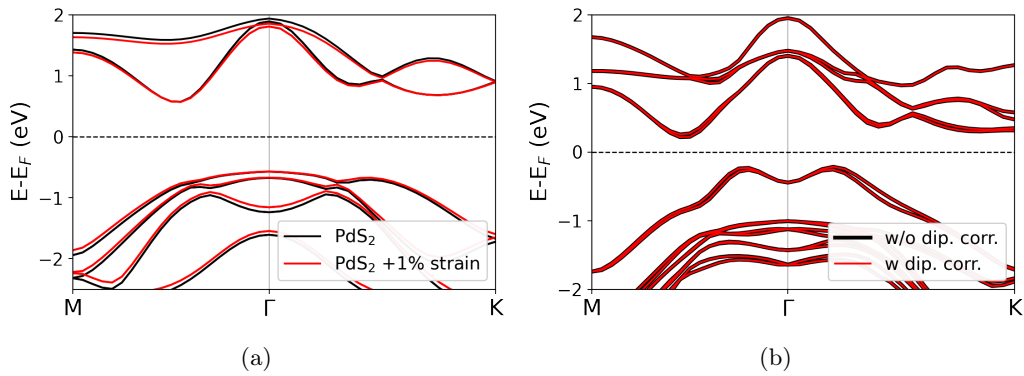

Figure S3: (a) DFT electronic bandstructure of relaxed monolayer Pd<sub>2</sub> (black lines) and monolayer Pd<sub>2</sub> under 1% biaxial strain (red lines). (b) DFT electronic bandstructure of the PdS<sub>2</sub>/PtS<sub>2</sub> vdWH computed with (red lines) and without (black lines) dipole correction along the out-of-plane direction, as implemented in [1].

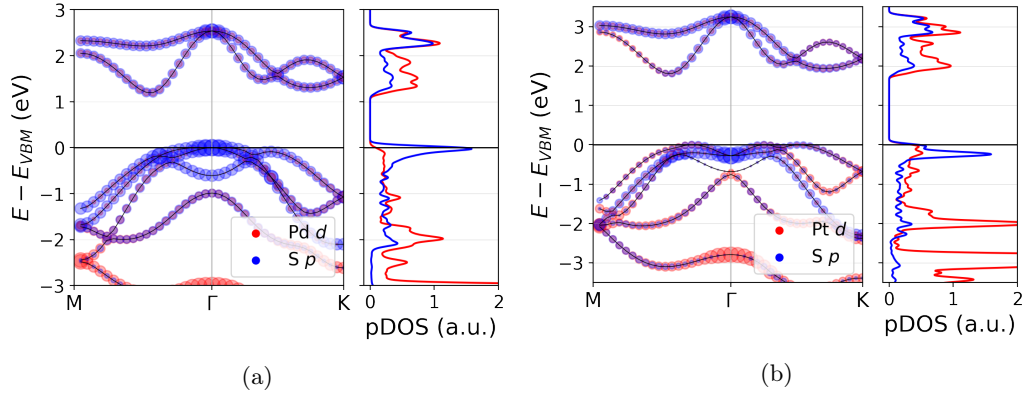

Figure S4: pDOS and kpDOS of PdS<sub>2</sub> (a) and PtS<sub>2</sub> (b) as obtained from DFT calculations. Contributions from metal  $d$ -orbitals and sulfur  $p$ -orbitals are reported in red and blue, respectively.

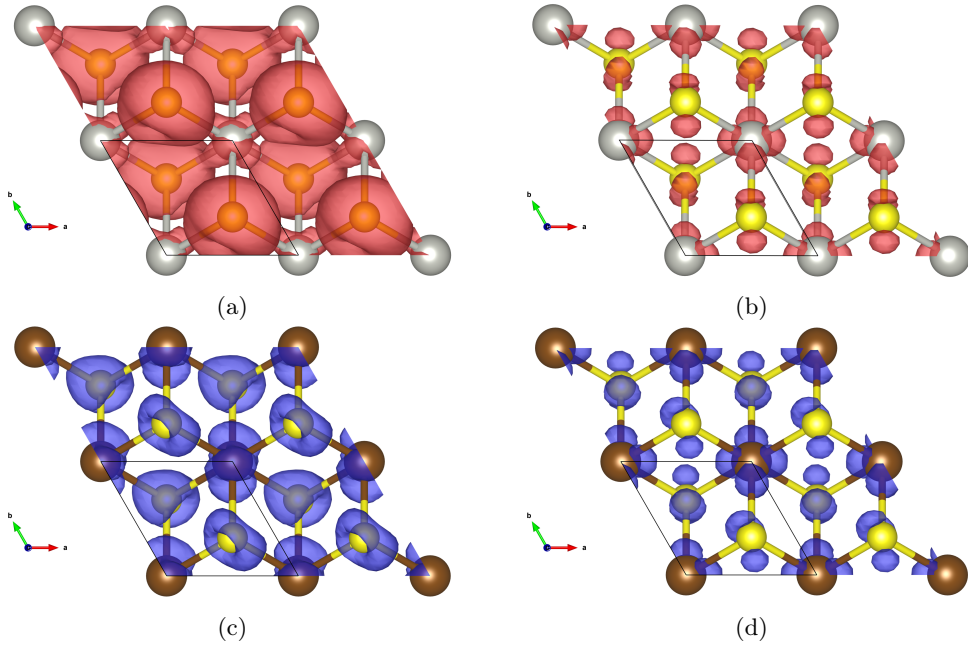

Figure S5: (a), (b) Square moduli of the wavefunctions of the tVB and bCB states, respectively, involved in the  $G$  exciton for PdS<sub>2</sub>. (c), (d) Square moduli of the wavefunctions of the tVB and bCB states, respectively, involved in the  $G$  exciton for PtS<sub>2</sub>.

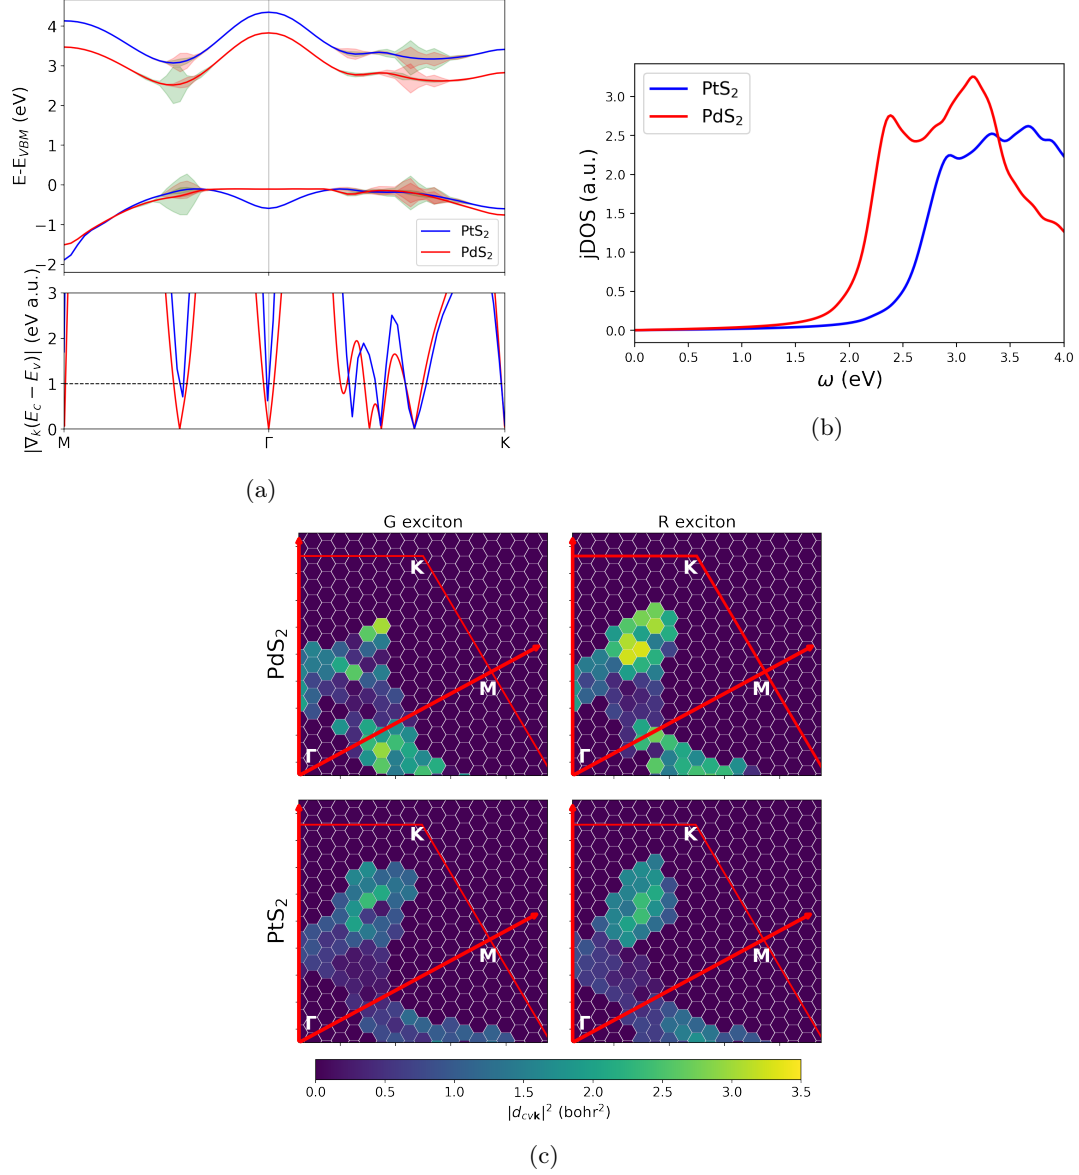

Figure S6: (a) Top panel: QP bandstructures of PdS<sub>2</sub> (red lines) and PtS<sub>2</sub> (blue lines). Lower panel: gradient along the Brillouin zone path of the difference between the bCB and tVB energies. In correspondence with small values ( $<1$ ) the band-nesting condition is realised (cf. Ref. [2]). (b) Joint density of states (jDOS) of PdS<sub>2</sub> (red line) and PtS<sub>2</sub> (blue line). (c) Square modulus of the electric dipole matrix elements  $|d_{cv\mathbf{k}}|^2$  for transitions  $v \rightarrow c$ , at point  $\mathbf{k}$  in the irreducible Brillouin zone, contributing to the  $G$  (first column) and  $R$  (second column) excitons in PdS<sub>2</sub> (top row) and PtS<sub>2</sub> (bottom row).

## References

- [1] T. Sohier, M. Calandra, F. Mauri, *Phys. Rev. B* **96**, 075448 (2017).
- [2] A. Carvalho, R. M. Ribeiro, A. H. Castro Neto, *Phys. Rev. B* **88**, 115205 (2013).
